# Supplementary material
Source: HighWire-hosted journal article supplement (https://www.jrheum.org/highwire/filestream/34137/field_highwire_adjunct_files/0/171325DataSuppl.pdf)

**Supplementary Table 1.** Prevalence of infections in 165 SLE patients during the period of 1.5 years.

| <b>Number of infections during the period</b> | <b>Number of subjects</b> | <b>Percentage, %</b> |
|-----------------------------------------------|---------------------------|----------------------|
| 0                                             | 93                        | 56.4                 |
| 1                                             | 40                        | 24.2                 |
| 2                                             | 24                        | 14.5                 |
| 3                                             | 5                         | 3.0                  |
| 4                                             | 3                         | 1.8                  |

SLE: systemic lupus erythematosus.

**Supplementary Figure 1.** Relationship between serum levels of complement factors and infection risk in 165 SLE patients. (A) The percentage of patients with at least one infection and (B) the number of infections per SLE patient with normal ( $\geq 0.76$  g/L), low (0.50-0.76 g/L), and very low ( $<0.50$  g/L) serum levels of complement factor 3. (C) The percentage of patients with at least one infection and (D) the number of infections per SLE patient with ( $\geq 0.13$  g/L), low (0.087-0.13 g/L), and very low ( $<0.087$  g/L) serum levels of complement factor 4.

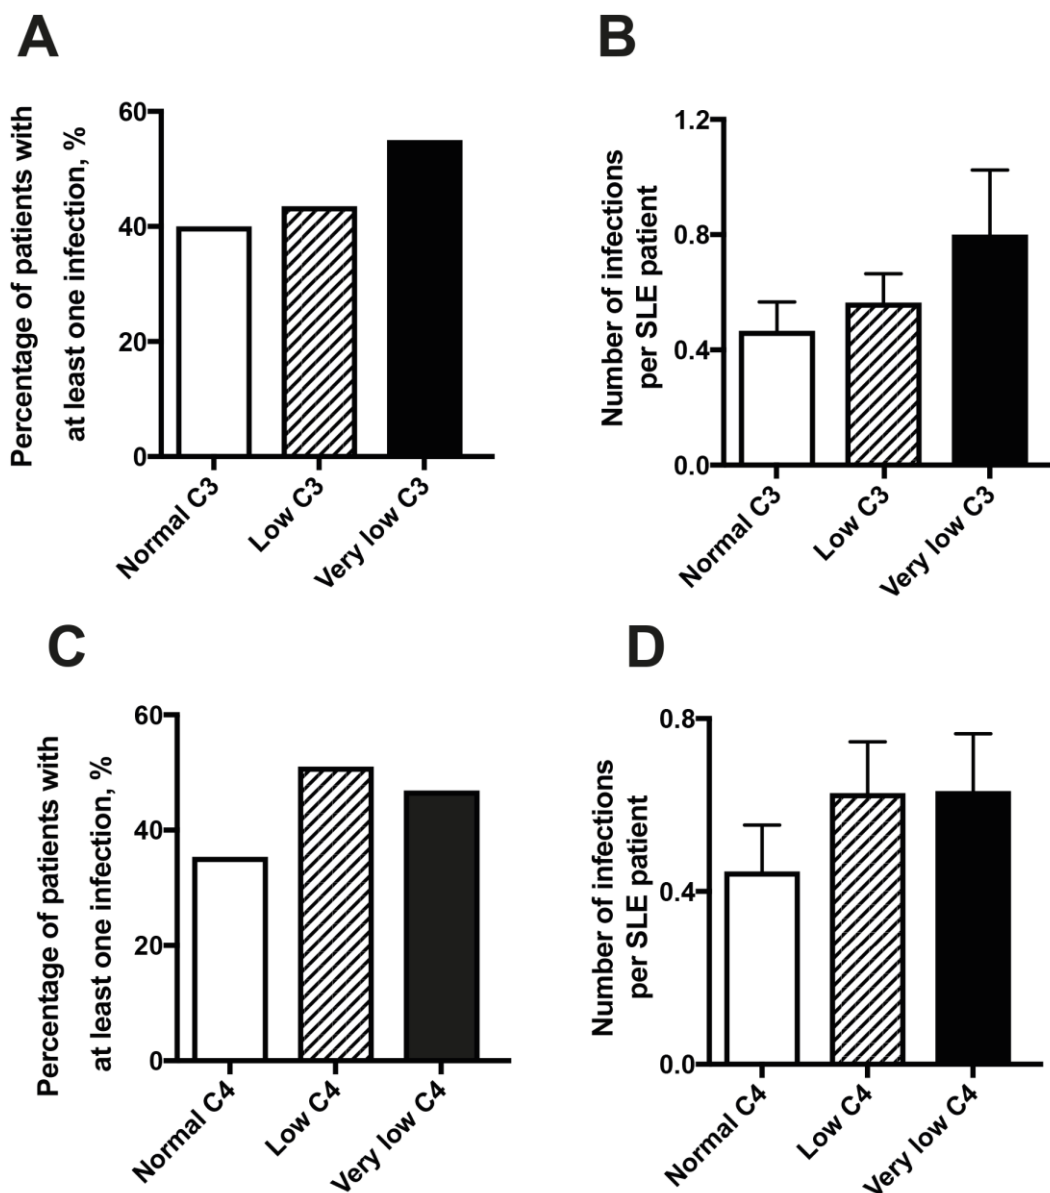

Supplement: 171325DataSuppl.pdf [file 171325DataSuppl.pdf]
